# Supplementary material for: Oxidized Lipids and Lysophosphatidylcholine Induce the Chemotaxis, Up-Regulate the Expression of CCR9 and CXCR4 and Abrogate the Release of IL-6 in Human Monocytes
Source: Toxins (Basel). 2014 Sep 23;6(9):2840–56. doi: 10.3390/toxins6092840 (PMC4179163; doi:10.3390/toxins6092840)

# Supplementary Information

**Figure S1.** Phenotype of isolated adherent cells.

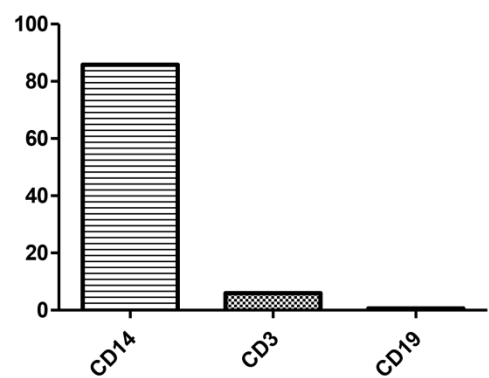

**Figure S2.** Effect of the lipids on the release of inflammatory cytokines and chemokines by monocytes. Monocytes were incubated with 20  $\mu$ M of the lipids for 24 h. Supernatants were collected and examined for the release of various cytokines and chemokines.

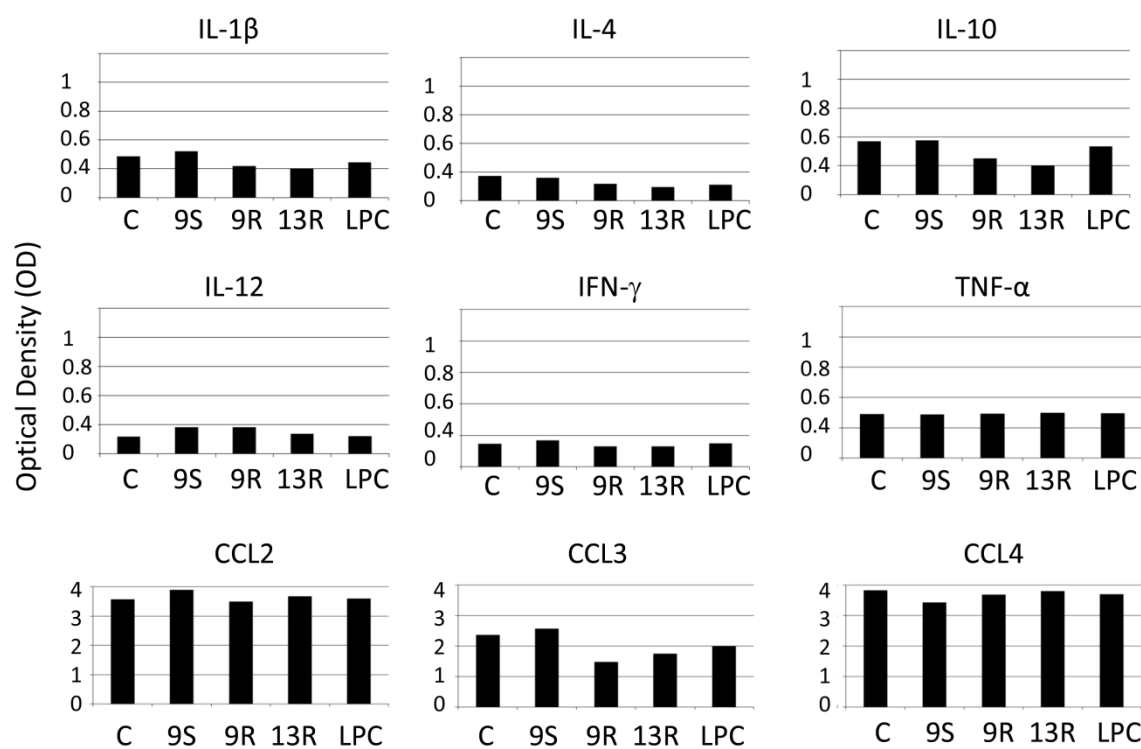

Supplement: Supplementary File 1 [file toxins-06-02840-s001.pdf]
